# Supplementary material
Source: MDPI journal article supplement (https://www.mdpi.com/2306-5338/9/10/185)
Supplement: s1 [file s1]

## Supplementary Material

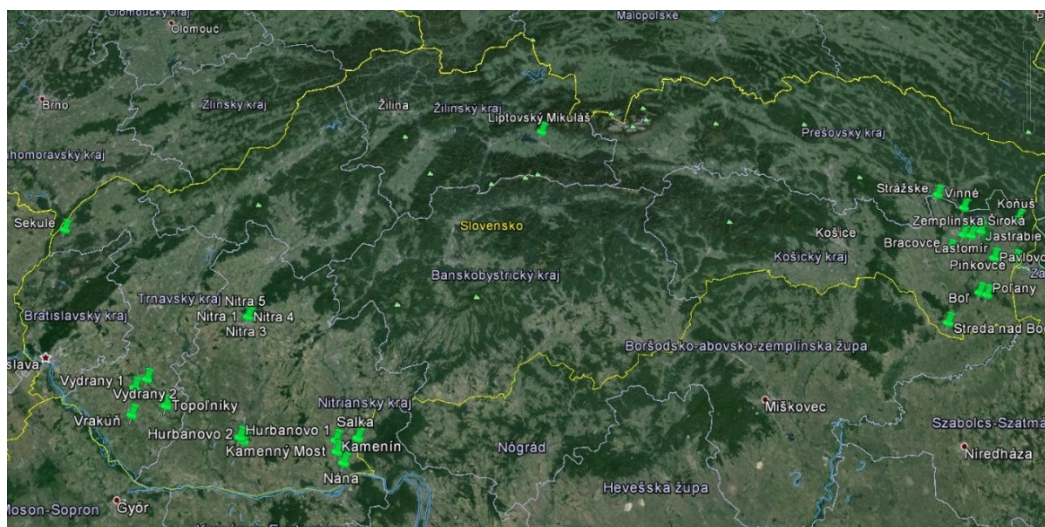

**Figure S1.** Location of the 35 probes throughout Slovakia, equipped with data teletransmission (2012–2020).

**Table S1.** Location and land use of measuring sites, where automatic measuring probes were installed.

| No. | Locality           | Land use           | GPS         |             |
|-----|--------------------|--------------------|-------------|-------------|
|     |                    |                    | N           | E           |
| 01  | Vinné              | vineyard, grass    | 48° 48.842′ | 21° 57.812′ |
| 02  | Bracovce           | orchard, grass     | 48° 38.584′ | 21° 50.094′ |
| 03  | Pavlovce           | orchard, grass     | 48° 36.702′ | 22° 04.170′ |
| 04  | Lastomír           | orchard, grass     | 48° 42.230′ | 21° 55.631′ |
| 05  | Strážske           | orchard, grass     | 48° 52.069′ | 21° 49.836′ |
| 06  | Sekule             | orchard, grass     | 48° 36.383′ | 16° 59.675′ |
| 07  | Hurbanovo 1        | orchard, grass     | 47° 53.055′ | 18° 10.298′ |
| 08  | Nitra 1            | lawn               | 48° 18.150′ | 18° 05.980′ |
| 09  | Iňačovce           | pastureland, grass | 48° 41.304′ | 22° 03.198′ |
| 10  | Streda n. Bodrogom | agricultural crops | 48° 21.526′ | 21° 44.659′ |
| 11  | Polány             | pastureland, grass | 48° 27.997′ | 21° 59.044′ |
| 12  | Boľ                | pastureland, grass | 48° 28.495′ | 21° 56.774′ |
| 13  | Liptovský Mikuláš  | lawn               | 49° 05.838′ | 19° 35.392′ |
| 14  | Jastrabie          | agricultural crops | 48° 43.199′ | 22° 01.727′ |
| 15  | Koňuš              | vineyard, grass    | 48° 46.383′ | 22° 15.639′ |
| 16  | Pinkovce           | orchard, grass     | 48° 36.325′ | 22° 11.056′ |
| 17  | Zemplínska Široká  | orchard, grass     | 48° 42.007′ | 21° 58.192′ |
| 18  | Nitra 3            | orchard, grass     | 48° 18.082′ | 18° 06.117′ |
| 19  | Nitra 2            | orchard, grass     | 48° 18.121′ | 18° 06.054′ |
| 20  | Hurbanovo 2        | lawn               | 47° 52.345′ | 18° 11.573′ |
| 21  | Nitra 4            | orchard, grass     | 48° 18.010′ | 18° 05.971′ |
| 22  | Nitra 5            | orchard, grass     | 48° 18.208′ | 18° 05.791′ |
| 23  | Vrakúň             | agricultural crops | 47° 56.428′ | 17° 37.025′ |
| 24  | Topoľníky          | orchard, grass     | 47° 58.593′ | 17° 46.623′ |
| 25  | Kamenín            | vineyard, grass    | 47° 53.315′ | 18° 38.463′ |
| 26  | Vydrany 1          | agricultural crops | 48° 01.988′ | 17° 35.907′ |

---

|    |              |                    |             |             |
|----|--------------|--------------------|-------------|-------------|
| 27 | Vydrany 2    | agricultural crops | 48° 03.884′ | 17° 39.005′ |
| 28 | Salka        | agricultural crops | 47° 53.918′ | 18° 44.795′ |
| 29 | Nána         | agricultural crops | 47° 49.010′ | 18° 41.593′ |
| 30 | Kamenný Most | orchard, grass     | 47° 51.130′ | 18° 39.218′ |

---
